# Supplementary material for: Helicobacter pylori infection might be a protective factor against Parkinson’s disease
Source: Research Square preprint supplement (doi:10.21203/rs.3.rs-5973815/v1), 2025-05-06
Supplement: Supplementary file 1 [file 337eb9ce8373bff4c81d64d3.docx]

Supplement table 1

| **H. pylori infection rate between Parkinson’s disease patients and outpatients population in the rural and urban area** | | | | | | |
| --- | --- | --- | --- | --- | --- | --- |
| Area | Rural | | | Urban | | |
| Characteristics | PD | Outpatients population | *P* value | PD | Outpatients population | *P* value |
| H.P positive (DOB**≥**4), n (%) | 53(30.8) | 1512(41.7) | 0.005 | 37(25.9) | 6080(32.4) | 0.096 |
| H.P positive (DOB**≥**8), n (%) | 38(22.1) | 1303(35.9) | <0.001 | 33(23.1) | 4857(25.9) | 0.443 |

n (%) indicates the number of constituents (n) and the composition ratio (%).

A

B


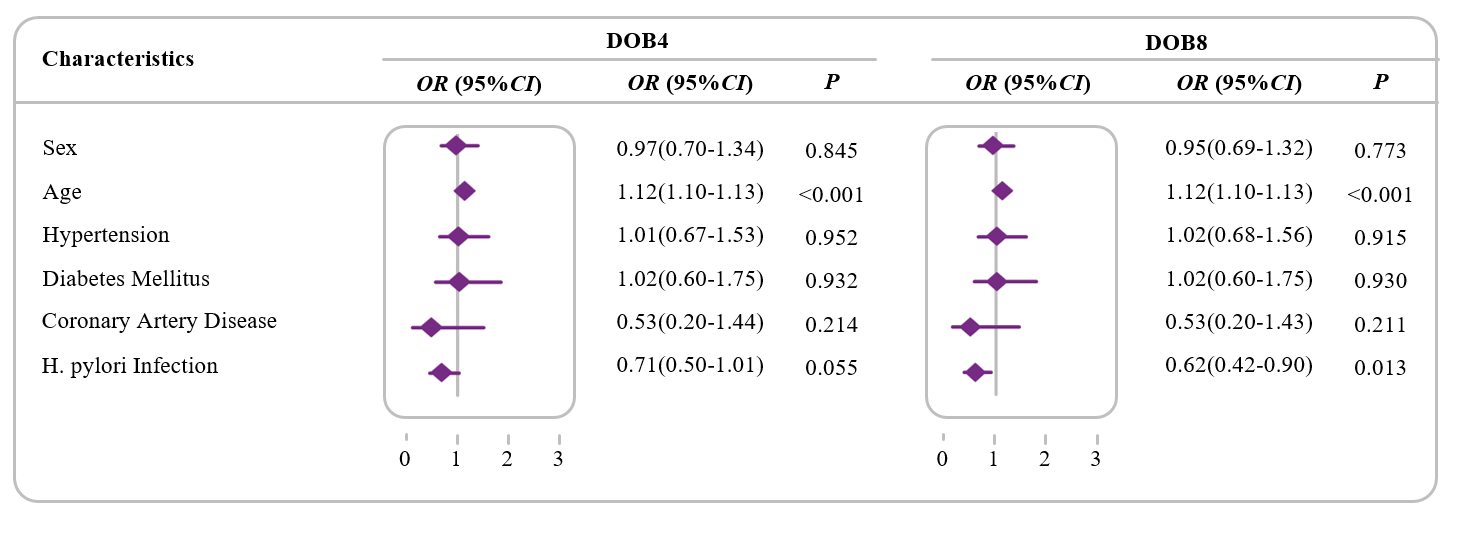


**Supplement Fig 1. Comparison of *H. pylori* infection rates in PD patients with outpatients population for confounding factors by multivariate logistic regression analysis in rural and urban, respectively.** A. Comparison of *H. pylori* infection rates in PD patients with outpatients population. B. Association of *H. pylori* infection and PD by a multivariate logistic regression analysis in rural area. Odds ratio (ORs) was adjusted for the sex (male=1, female =0), age (years), Hypertension (Yes=1, No=0), Diabetes Mellitus (Yes=1, No=0), Coronary Artery Disease (Yes=1, No=0),, *H. pylori* infection (Positive=1, Negative=0). ***p* < 0.01. ****p* < 0.001.

Supplement table 2

| **The H. pylori infection rate between Parkinson’s disease patients and outpatients population in the different age** | | | | | | |
| --- | --- | --- | --- | --- | --- | --- |
| Age | ＜65 | | | ≥65 | | |
| Characteristics | PD | Outpatients population | *P* value | PD | Outpatients population | *P* value |
| H.P positive (DOB**≥**4), n (%) | 38(25.2) | 6849(34.1) | 0.021 | 52(31.7) | 743(32.2) | 0.901 |
| H.P positive (DOB**≥**8), n (%) | 29(19.2) | 5581(27.8) | 0.019 | 42(25.6) | 579(25.1) | 0.879 |

n (%) indicates the number of constituents (n) and the composition ratio (%).
